# Supplementary material
Source: PubMed Central journal article supplement (PMC6440712)
Supplement: jamaoncol-4-1721-s001.pdf [file jamaoncol-4-1721-s001.pdf]

## Supplementary Online Content

Wang DY, Salem J-E, Cohen JV, et al. Fatal toxic effects associated with immune checkpoint inhibitors: a systematic review and meta-analysis [published online September 13, 2018]. *JAMA Oncol*. doi:10.1001/jamaoncol.2018.3923

### eMethods

**eTable 1.** List of irAEs included

**eTable 2.** Additional demographic of fatal immune related adverse events in Vigilyze

**eTable 3.** Clinical features of 21 ICI-related fatalities from six large academic centers

**eFigure 1.** Proportion of fatal toxicities, overall survival, and time to symptom onset

**eFigure 2.** PRISMA diagram for articles selected for meta-analysis

**eFigure 3.** Forest plot of incidence of death due to immune related adverse events with anti-CTLA-4 therapy

**eFigure 4.** Forest plot of incidence of death due to immune related adverse events with anti-PD-1 therapy

**eFigure 5.** Forest plot of incidence of death due to immune related adverse events with anti-PD-L1 therapy

**eFigure 6.** Forest plot of incidence of death due to immune related adverse events with combination anti-CTLA-4 and anti-PD-1 therapy

This supplementary material has been provided by the authors to give readers additional information about their work.

## **eSupplement Table of Contents**

|                                                                                                                                           |    |
|-------------------------------------------------------------------------------------------------------------------------------------------|----|
| eMethods.....                                                                                                                             | 2  |
| eTable 1: List of irAEs included.....                                                                                                     | 3  |
| eTable 2: Additional demographic of fatal immune related adverse events in Vigilyze.....                                                  | 6  |
| eTable 3: Clinical features of 21 ICI-related fatalities from six large academic centers.....                                             | 7  |
| eFigure 1: A) Proportion of fatal toxicities over time for ipilimumab therapy.....                                                        | 9  |
| B) Proportion of fatal toxicities over time for anti-PD-1/PD-L1 therapy                                                                   |    |
| C) Proportion of fatal toxicities over time for combination therapy                                                                       |    |
| D) Overall survival for patients with fatal ICI toxicities                                                                                |    |
| E) Time to symptom onset of fatal toxicities by treatment in individual patients                                                          |    |
| <br>                                                                                                                                      |    |
| eFigure 2: PRISMA diagram for articles selected for meta-analysis.....                                                                    | 10 |
| <br>                                                                                                                                      |    |
| eFigure 3: Forest plot of incidence of death due to immune related adverse events with anti-CTLA-4 therapy.....                           | 11 |
| <br>                                                                                                                                      |    |
| eFigure 4: Forest plot of incidence of death due to immune related adverse events with anti-PD-1 therapy.....                             | 12 |
| <br>                                                                                                                                      |    |
| eFigure 5: Forest plot of incidence of death due to immune related adverse events with anti-PD-L1 therapy.....                            | 13 |
| <br>                                                                                                                                      |    |
| eFigure 6: Forest plot of incidence of death due to immune related adverse events with combination anti-CTLA-4 and anti-PD-1 therapy..... | 14 |

## **eMethods**

### Data source

The study is based on adverse drug reactions reported in VigiBase, the WHO global Individual Safety Case Reports (ISCRs) database, originating from >130 countries. VigiBase is managed by the Uppsala Monitoring Center (UMC) and contains >16,000,000 ISCRs submitted by national pharmacovigilance centers since 1968. These reports originate from different sources such as healthcare professionals, patients, and pharmaceutical companies and are generally notified post-marketing.

### Search

Vigilyze was accessed and queried on January 30, 2018. Drug terms searched were “ipilimumab,” and “tremelimumab” (anti-CTLA-4); “nivolumab,” and “pembrolizumab” (anti-PD-1); and “atezolizumab,” “avelumab,” and “durvalumab” (anti-PD-L1), yielding 31,059 unique reports. Combination therapy was defined as anti-PD-1 or anti-PD-L1 given concurrently with anti-CTLA-4. Each report contains general administrative information (country of origin, date of reporting, reporter qualification), patient characteristics (sex, age), drugs (indication for the drug, start and end dates, dosage regimen, route of administration), reactions/events (reported terms, MedDRA classification terms, onset date, end date, seriousness, final outcome). Date of treatment initiation, date of symptom onset and death, patient demographics, and cancer type were collected when reported.

**eTable 1: List of irAEs included**

|                                         |
|-----------------------------------------|
| <b>Toxicity</b>                         |
|                                         |
| <b>Endocrine</b>                        |
| Addison's disease                       |
| Adrenal insufficiency                   |
| Adrenocortical insufficiency acute      |
| Adrenocorticotrophic hormone deficiency |
| Autoimmune thyroiditis                  |
| Diabetic ketoacidosis                   |
| Fulminant type 1 diabetes mellitus      |
| Hyperthyroidism                         |
| Hypophysitis                            |
| Hypopituitarism                         |
| Hypothalamo-pituitary disorder          |
| Hypothyroidism                          |
| Lymphocytic hypophysitis                |
| Pituitary enlargement                   |
| Secondary adrenocortical insufficiency  |
| Thyroiditis                             |
| Type 1 diabetes mellitus                |
|                                         |
| <b>Gastrointestinal</b>                 |
| Acute hepatic failure                   |
| Autoimmune colitis                      |
| Autoimmune hepatitis                    |
| Autoimmune pancreatitis                 |
| Colitis                                 |
| Colitis microscopic                     |
| Diarrhoea                               |
| Diarrhoea haemorrhagic                  |
| Drug-induced liver injury               |
| Duodenitis                              |
| Enteritis                               |
| Enterocolitis                           |
| Enterocolitis haemorrhagic              |
| Eosinophilic oesophagitis               |
| Hepatic failure                         |
| Hepatitis                               |
| Hepatitis acute                         |
| Hepatotoxicity                          |
| Pancreatitis                            |
| Ulcerative gastritis                    |
|                                         |
| <b>Pulmonary</b>                        |

|                                    |
|------------------------------------|
| Pneumonitis                        |
| Organising pneumonia               |
|                                    |
| <b>Cardiac</b>                     |
| Myocarditis                        |
| Autoimmune myocarditis             |
|                                    |
| <b>Neurologic</b>                  |
| Autoimmune neuropathy              |
| Demyelinating polyneuropathy       |
| Encephalitis                       |
| Encephalitis autoimmune            |
| Encephalopathy                     |
| Guillain-Barre syndrome            |
| Limbic encephalitis                |
| Meningitis                         |
| Meningitis aseptic                 |
| Myasthenia gravis                  |
| Myasthenia gravis crisis           |
| Myasthenic syndrome                |
| Myositis                           |
| Necrotising myositis               |
| Neuropathy peripheral              |
| Ocular myasthenia                  |
| Peripheral motor neuropathy        |
| Peripheral sensorimotor neuropathy |
| Peripheral sensory neuropathy      |
| Polymyositis                       |
| Rhabdomyolysis                     |
|                                    |
| <b>Hematologic</b>                 |
| Autoimmune haemolytic anaemia      |
| Haemolytic anaemia                 |
| Histiocytosis haematophagic        |
| Immune thrombocytopenic purpura    |
|                                    |
| <b>Renal</b>                       |
| Nephritis                          |
|                                    |
| <b>Skin</b>                        |
| Pemphigoid                         |
| <b>Skin toxicity</b>               |
| Dermatitis                         |
| Dermatitis psoriasiform            |
| Drug eruption                      |

|                                       |
|---------------------------------------|
| Toxic skin eruption                   |
| Acute febrile neutrophilic dermatosis |
|                                       |
| <b>Other</b>                          |
| Granulomatosis with polyangiitis      |
| Infusion related reaction             |
|                                       |

**eTable 2: Additional demographic of fatal immune related adverse events in Vigilyze**

|  | <b>Ipilimumab<br/>(n = 193)</b> | <b>Anti-PD-<br/>1/PD-L1</b> | <b>Combination<br/>(n = 87)</b> | <b>P value</b> |
|--|---------------------------------|-----------------------------|---------------------------------|----------------|
|  |                                 |                             |                                 |                |

|                                  |          | (n = 333) |         |        |
|----------------------------------|----------|-----------|---------|--------|
| <b>Type of fatal irAE (n, %)</b> |          |           |         |        |
| <b>Neurologic</b>                | 11 (6)   | 50 (15)   | 7 (8)   | 0.003  |
| Myasthenia Gravis                | 1        | 22        | 2       |        |
| Guillan Barre Syndrome           | 3        | 4         | 0       |        |
| Encephalitis/Meningitis          | 2        | 20        | 4       |        |
| Other*                           | 5        | 4         | 1       |        |
| <b>Hematologic</b>               | 3 (2)    | 14 (4)    | 2 (2)   | 0.22   |
| ITP                              | 1        | 3         | 0       |        |
| Pancytopenia                     | 2        | 1         | 1       |        |
| Agranulocytosis                  | 0        | 1         | 0       |        |
| Hemolysis/Hemolytic anemia       | 0        | 3         | 0       |        |
| HLH                              | 0        | 2         | 0       |        |
| TTP                              | 0        | 1         | 1       |        |
| <b>Reporting Region</b>          |          |           |         |        |
| <b>Americas</b>                  | 105 (54) | 157 (47)  | 74 (85) | <0.001 |
| <b>Europe</b>                    | 69 (36)  | 128 (38)  | 12 (14) |        |
| <b>Asia</b>                      | 2 (1)    | 37 (11)   | 1 (1)   |        |
| <b>Oceania</b>                   | 17 (9)   | 11 (3)    | 0 (0)   |        |

\*Includes chronic idiopathic demyelinating polyneuropathy, posterior reversible encephalopathy syndrome, amyotrophy, neuritis, unspecified neuropathy, unspecified neurotoxicity. ITP: idiopathic thrombocytopenic purpura; HLH: hemophagocytic lymphohistiocytosis; TTP: thrombotic thrombocytopenic purpura.

**eTable 3: Clinical features of 21 ICI-related fatalities from six large academic centers**

| <b>Characteristic (n=21)</b> | <b>Number (%)</b> |
|------------------------------|-------------------|
|------------------------------|-------------------|

|                                                     |               |
|-----------------------------------------------------|---------------|
| <b>Female gender</b>                                | 8 (38)        |
| <b>Age</b> (years; median, range)                   | 72 (37 – 84)  |
| <b>Melanoma</b>                                     | 19 (90)       |
| <b>Merkel or squamous cell carcinoma</b>            | 2 (10)        |
| <b>Prior therapies</b>                              |               |
| Other immune therapy                                | 4 (19)        |
| BRAF and/or MEK inhibitors                          | 4 (19)        |
| Chemotherapy                                        | 3 (14)        |
| <b>Co-morbidities</b>                               |               |
| Hypertension                                        | 12 (57)       |
| Cardiac*                                            | 6 (29)        |
| Prior organ transplant                              | 2 (10)        |
| Autoimmune disease <sup>†</sup>                     | 2 (10)        |
| Diabetes                                            | 1 (5)         |
| <b>Regimen</b>                                      |               |
| Pembrolizumab                                       | 7 (33)        |
| Nivolumab                                           | 2 (10)        |
| Ipilimumab                                          | 7 (33)        |
| Ipilimumab + nivolumab                              | 5 (24)        |
| <b>Type of fatal irAE</b>                           |               |
| Myocarditis                                         | 6 (29)        |
| Neurologic <sup>#</sup>                             | 5 (24)        |
| Colitis/enteritis                                   | 6 (29)        |
| Hepatic failure                                     | 5 (24)        |
| Myositis                                            | 3 (14)        |
| Inflammatory syndrome and hypophysitis              | 2 (10)        |
| Stevens Johnson Syndrome                            | 1 (5)         |
| <b>Time to symptom onset</b> (days; median, range)  | 15 (3 – 543)  |
| <b>Time to steroids</b> (days; median, range)       | 5 (0 – 112)   |
| <b>Time to death</b> (days; median, range)          | 85 (10 – 585) |
| <b>Symptom onset to death</b> (days; median, range) | 32 (3 – 355)  |
| <b>Chronicity</b>                                   |               |
| Single hospitalization                              | 13 (62)       |
| Multiple hospitalizations                           | 8 (38)        |
| <b>Treatment</b>                                    |               |
| High dose steroids                                  | 21 (100)      |
| Infliximab                                          | 4 (19)        |
| Intravenous immunoglobulin                          | 5 (24)        |
| Rituximab                                           | 1 (5)         |



\*Atrial arrhythmias (n=5), coronary artery disease (n=1), #Encephalitis (n=2), Guillain-Barré Syndrome/acute inflammatory demyelinating polyneuropathy (n=1), undefined progressive weakness (n=2). †Graves disease in both cases.

eFigure 1

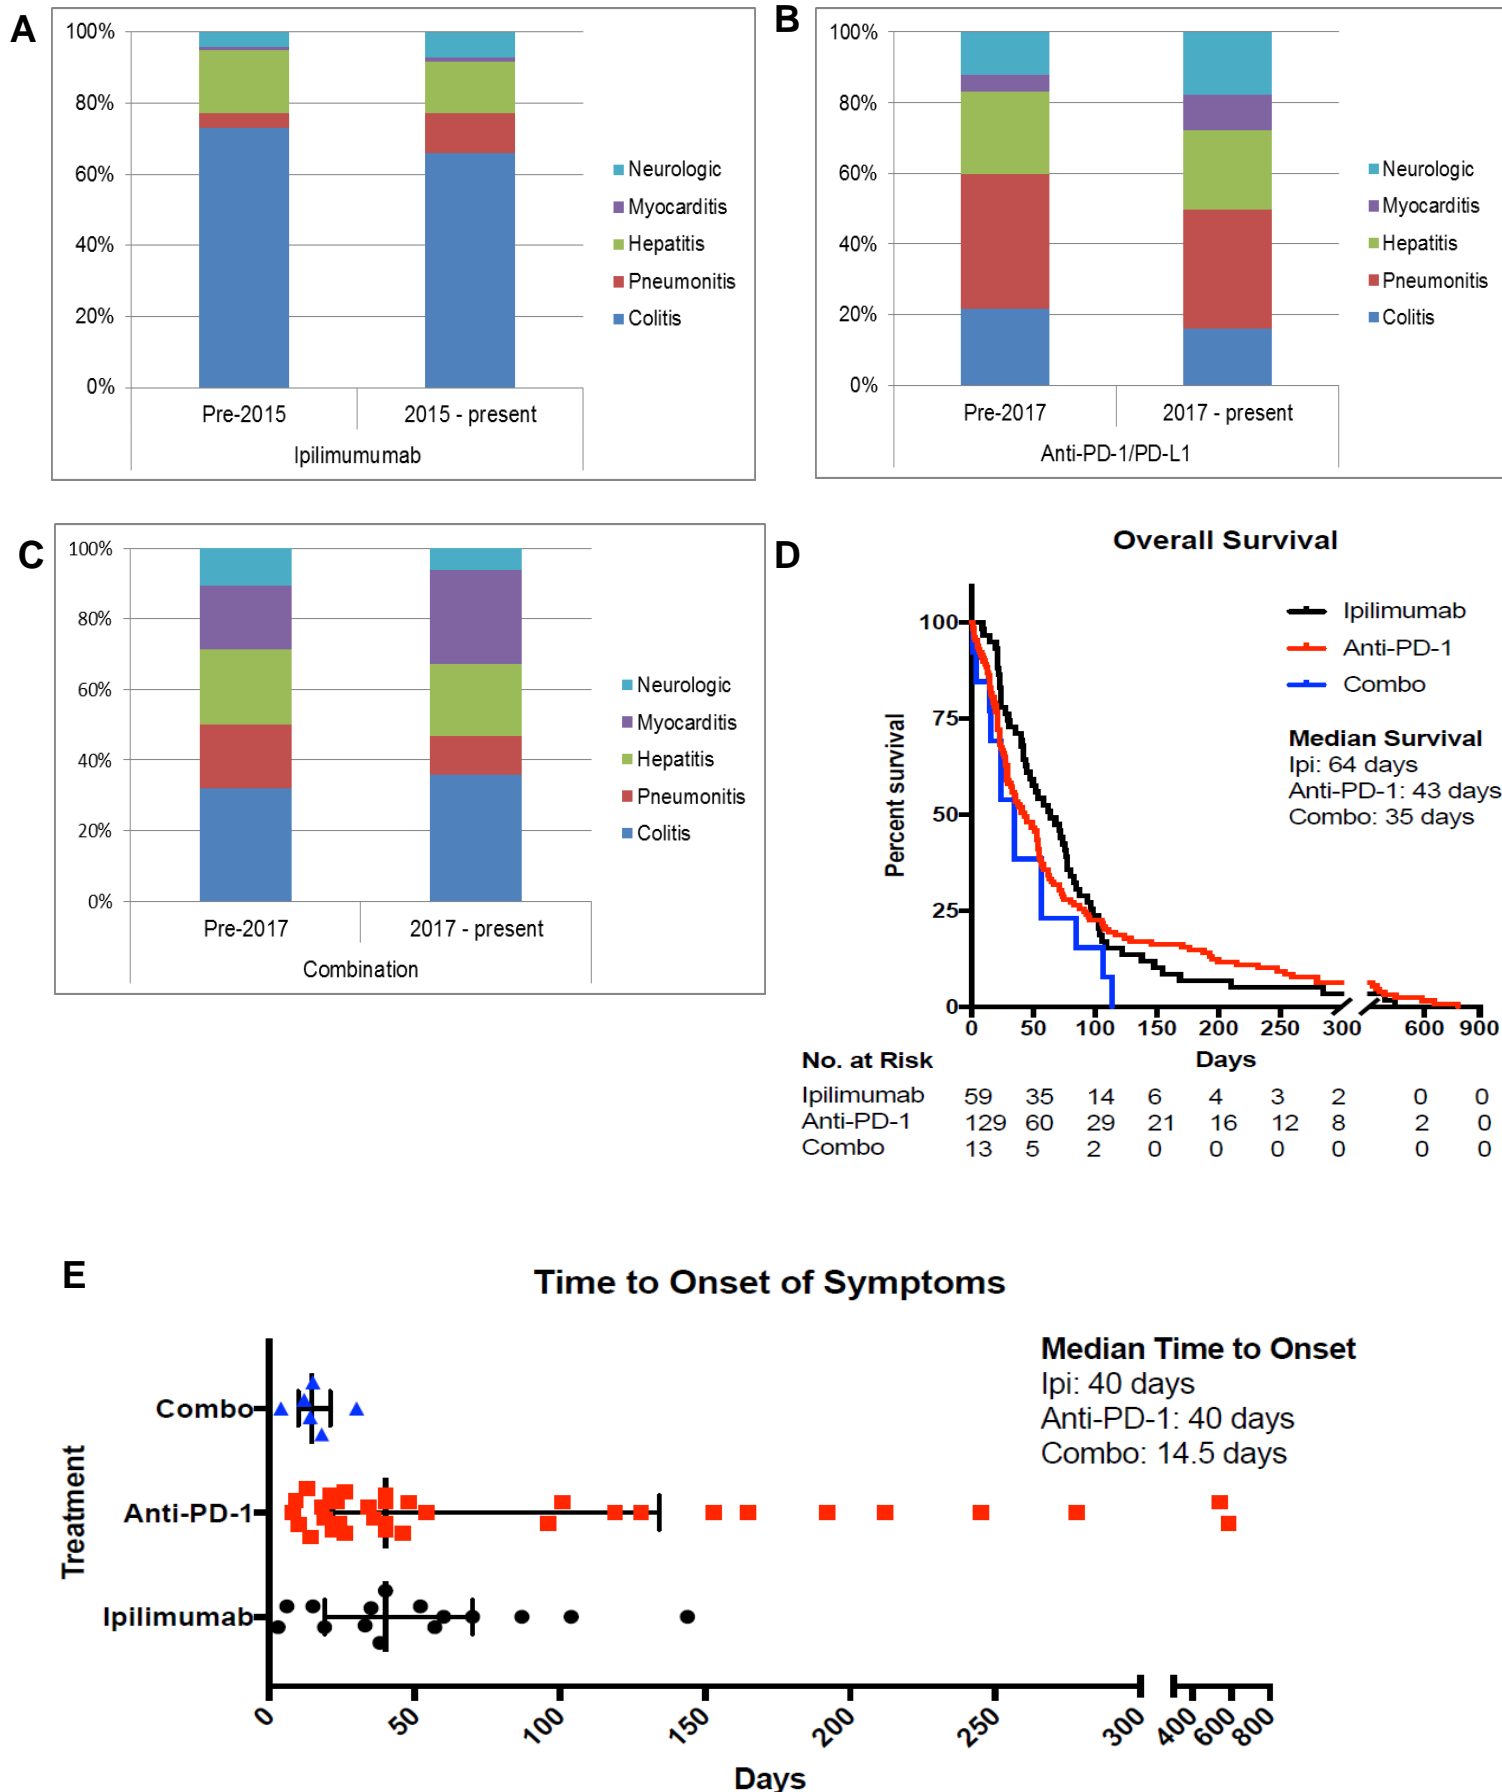

eFigure 2

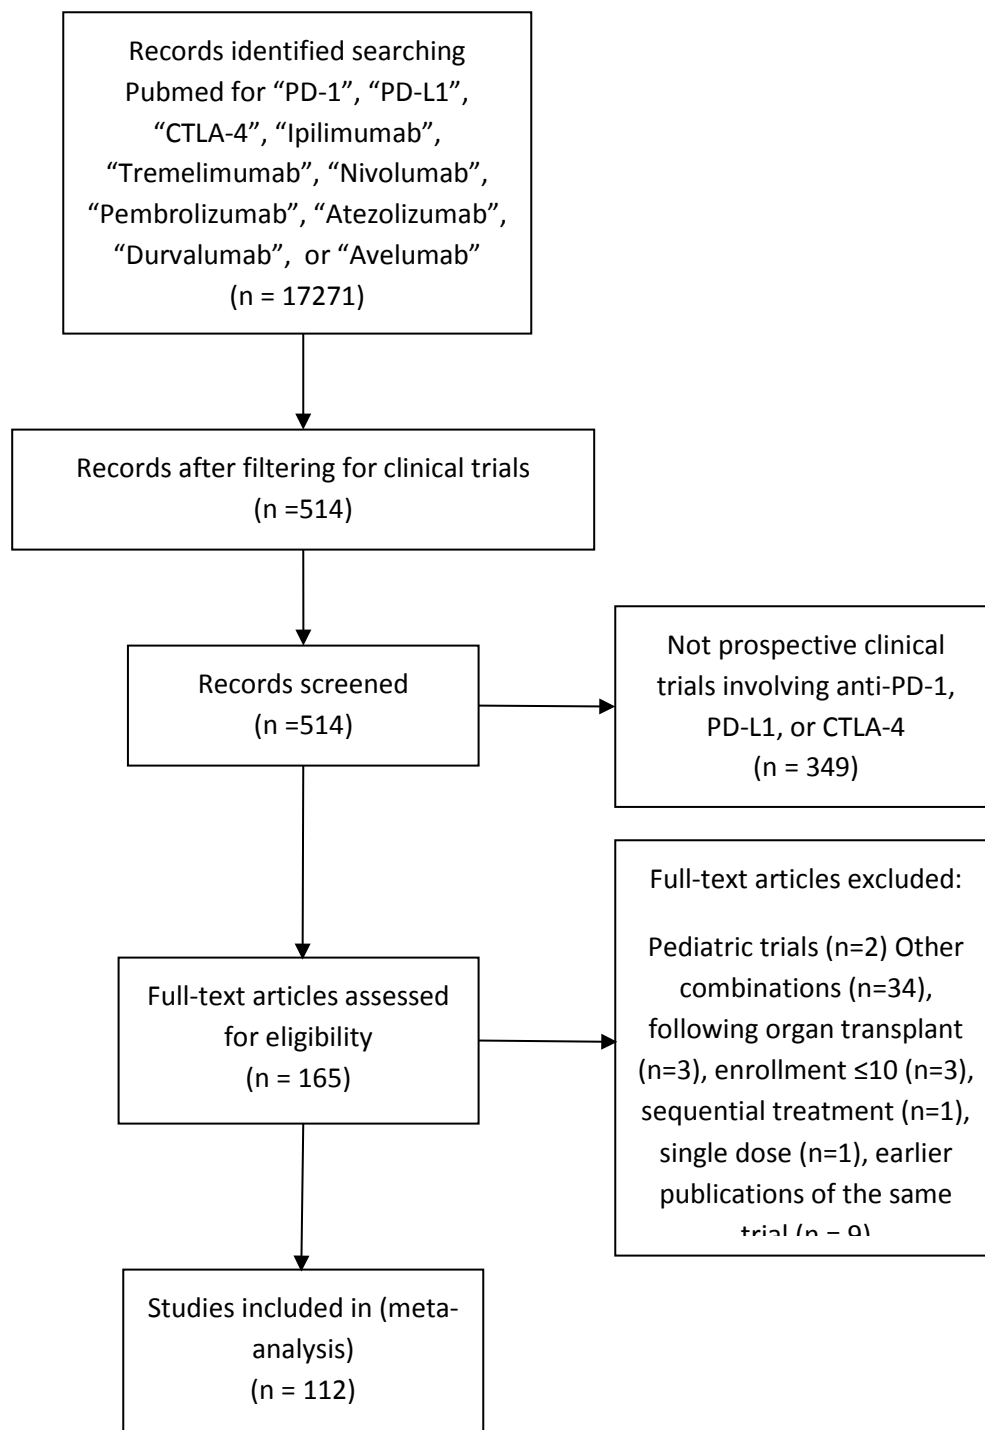

eFigure 3: Forest plot of incidence of death due to immune related adverse events with anti-CTLA-4 therapy

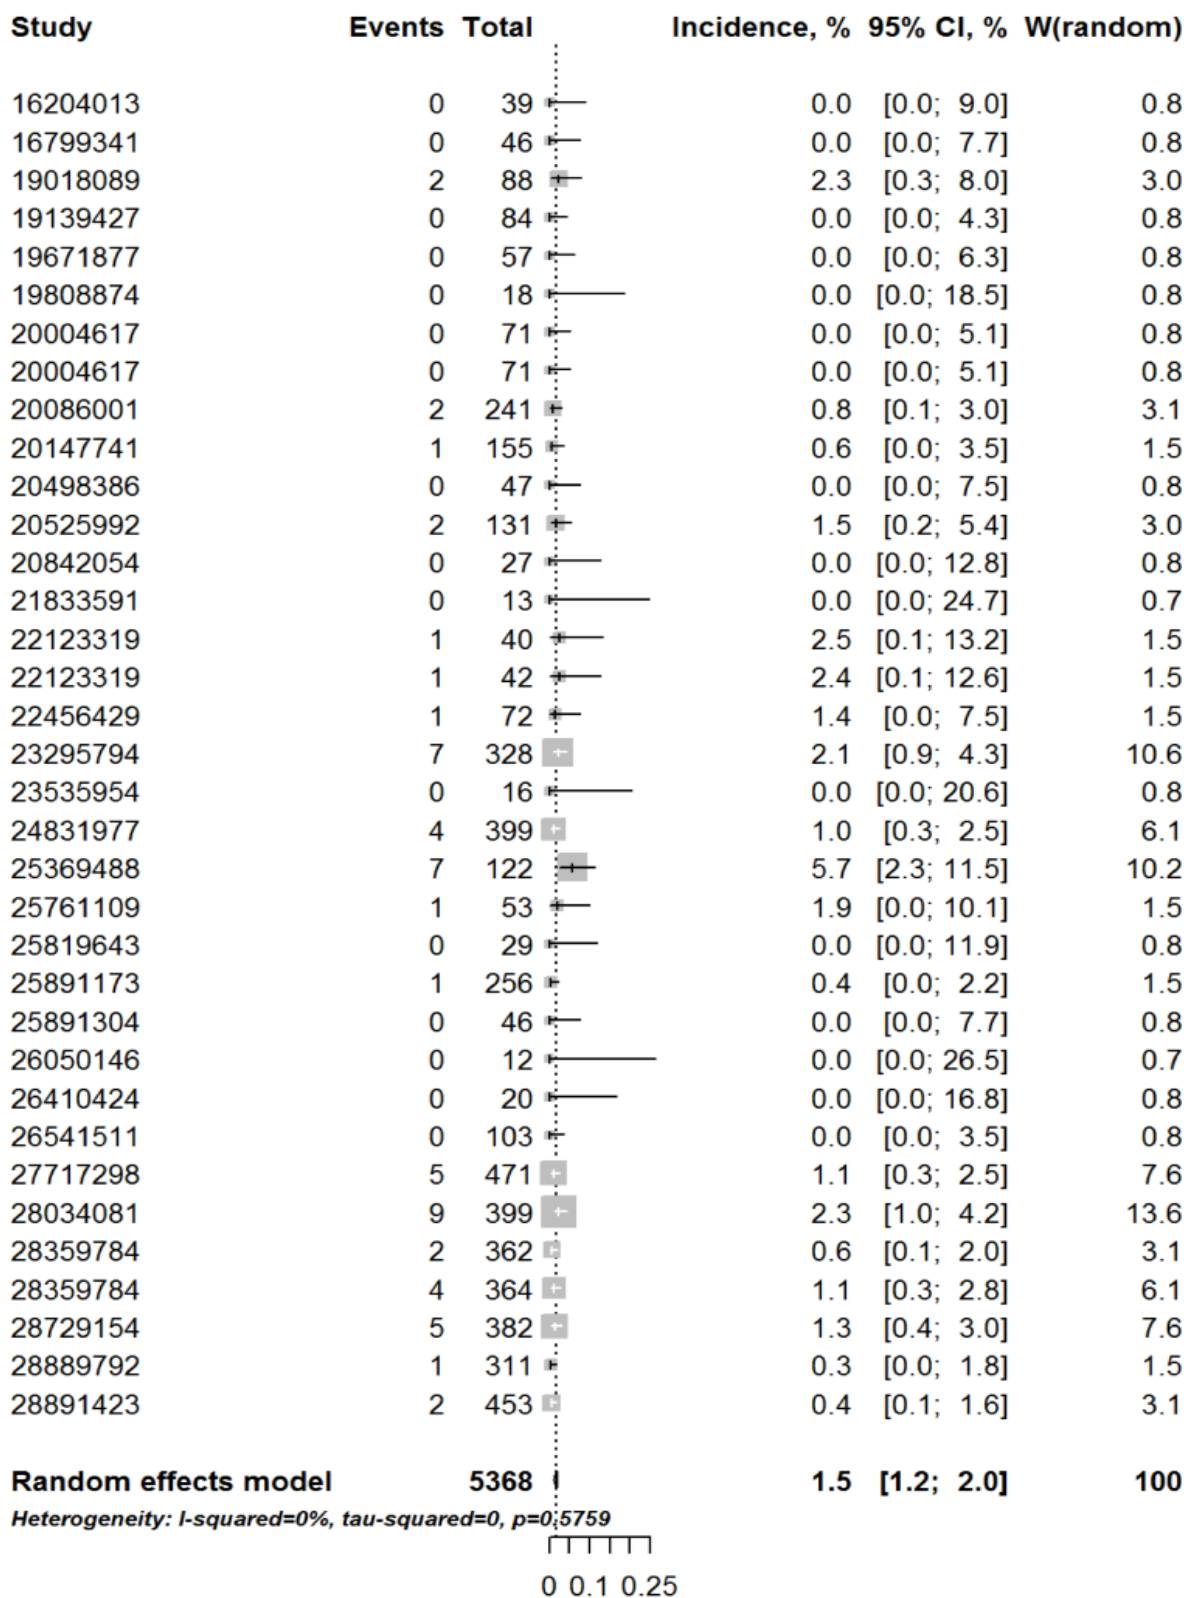

eFigure 4: Forest plot of incidence of death due to immune related adverse events with anti-PD-1 therapy

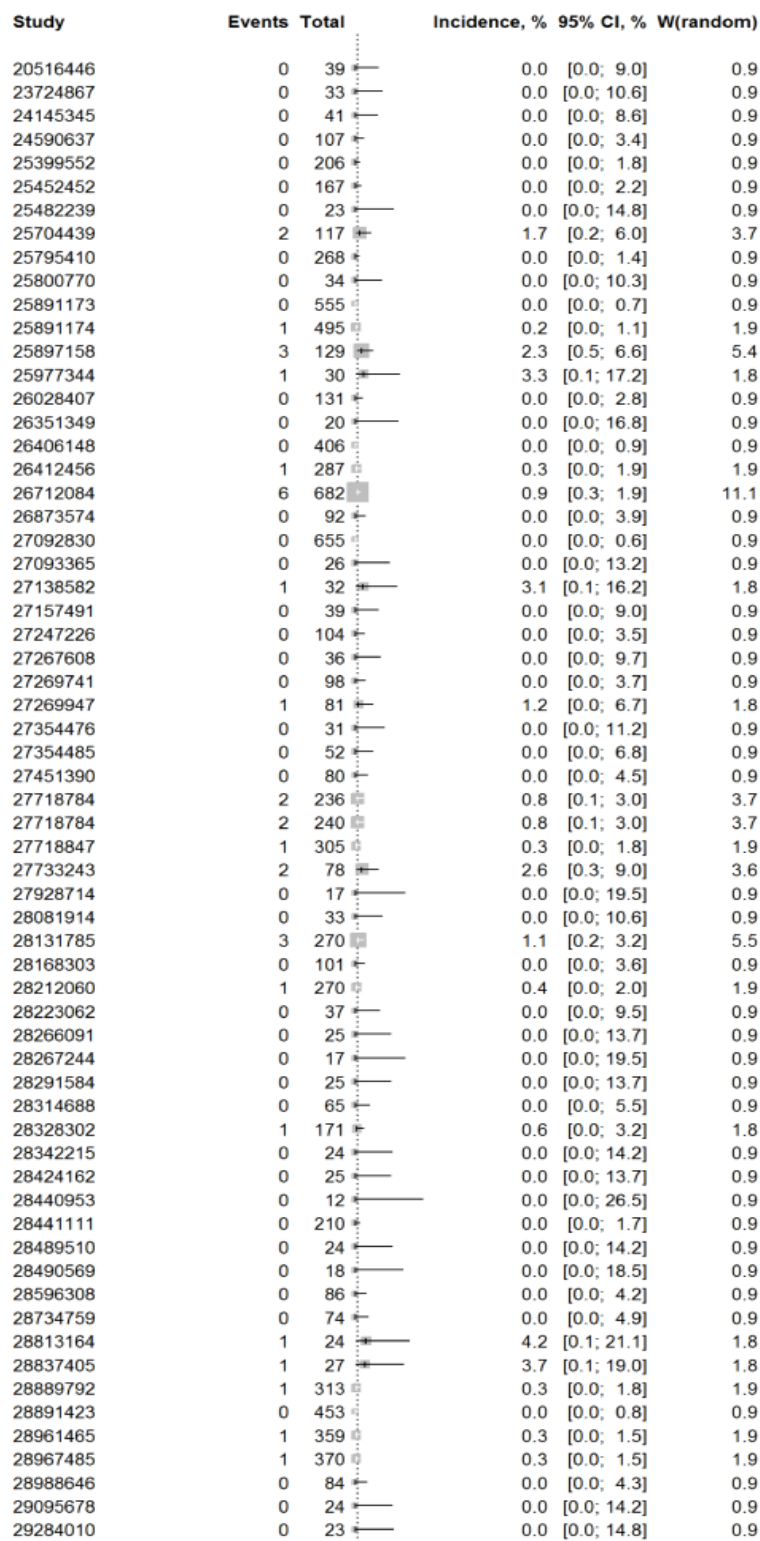

**Random effects model** 9136 0.9 [0.7; 1.2] 100

Heterogeneity: I-squared=0%, tau-squared=0, p=0.9503

eFigure 5: Forest plot of incidence of death due to immune related adverse events with anti-PD-L1 therapy

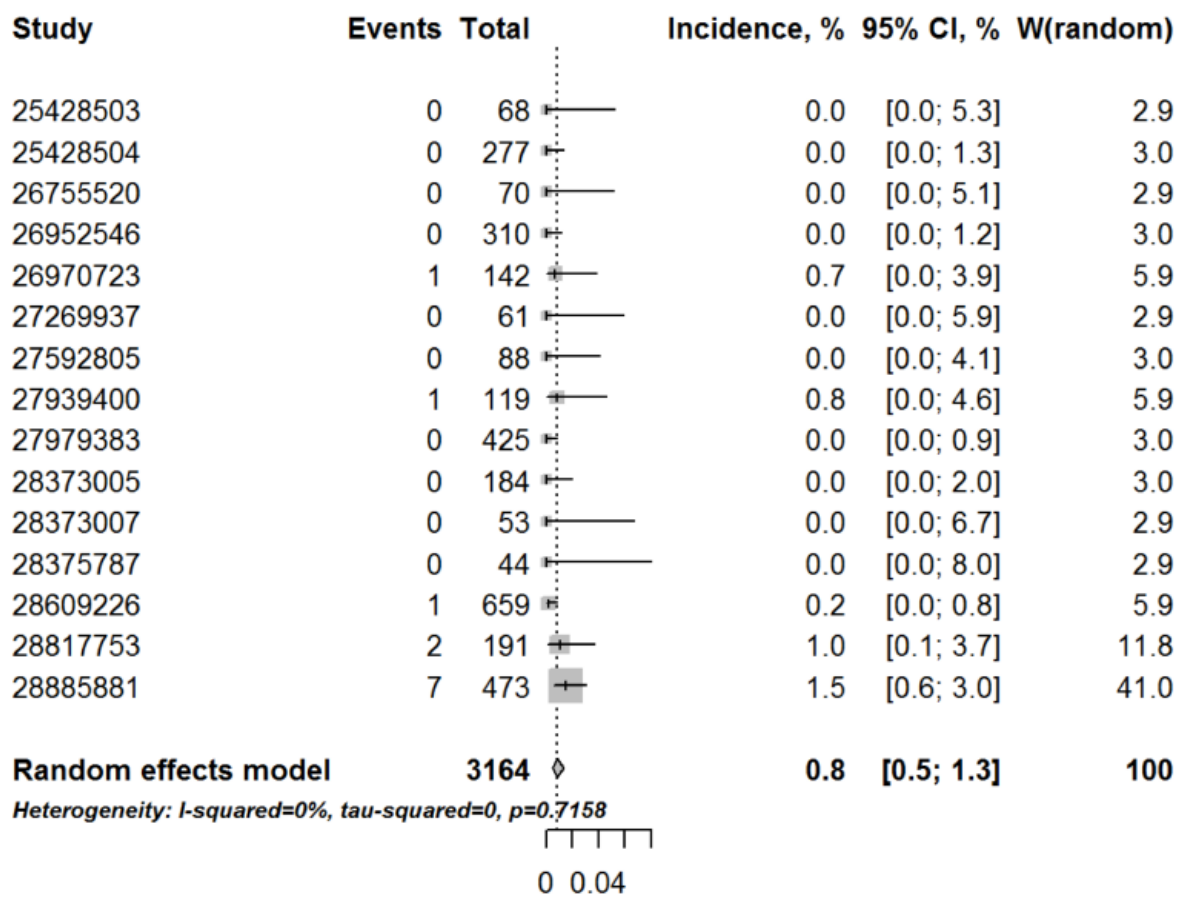

eFigure 6: Forest plot of incidence of death due to immune related adverse events with combination anti-CTLA-4 and anti-PD-1 therapy

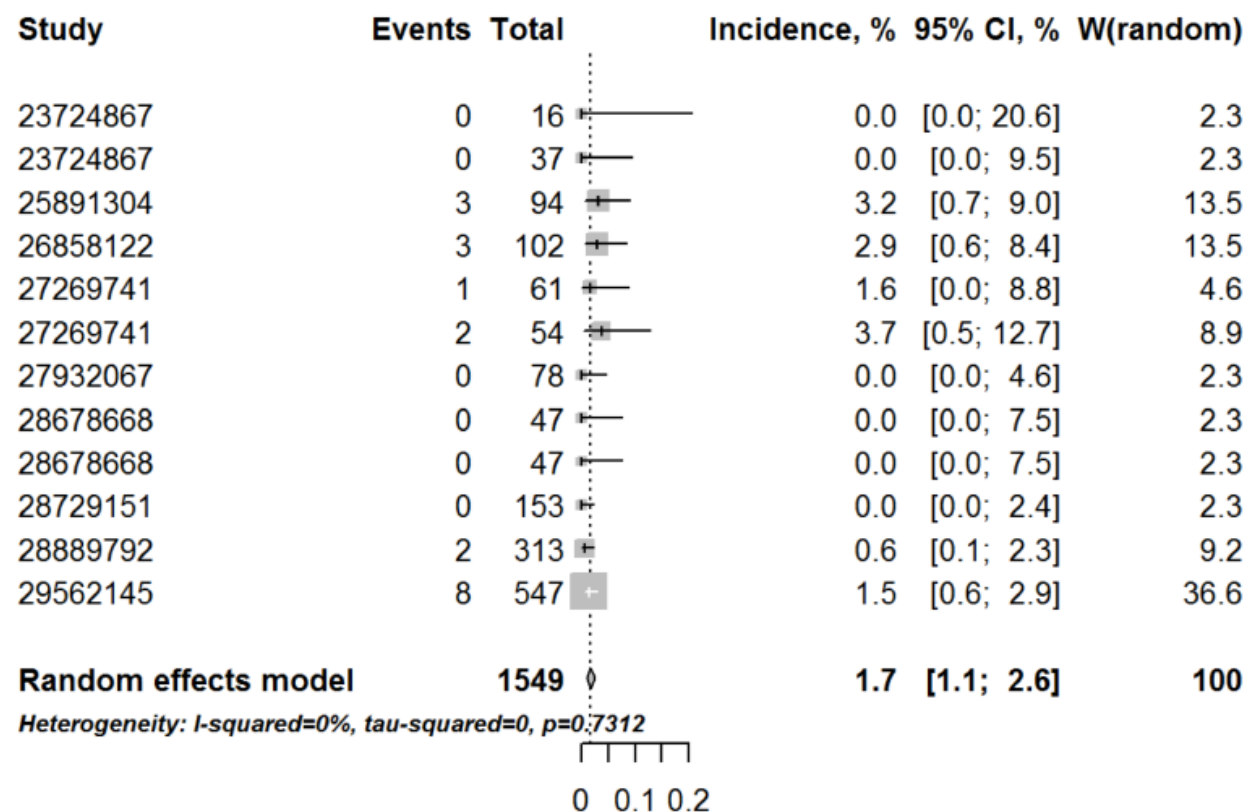

eTable 4.

| Tumor Type    | Treatment    | Class of Drug | Dose, if Ipi (mg/kg) | Phase | # of total patients | # deaths | Death types                    | Pubmed ID |
|---------------|--------------|---------------|----------------------|-------|---------------------|----------|--------------------------------|-----------|
| Solid cancers | Tremelimumab | Anti-CTLA 4   | -                    | 1     | 39                  | 0        |                                | 16204013  |
| Solid cancers | Ipilimumab   | Anti-CTLA 4   | -                    | 1     | 46                  | 0        |                                | 16799341  |
| Melano ma     | Ipilimumab   | Anti-CTLA 4   | up to 20             | 1     | 88                  | 2        | cardiac arrest, ischemia/edema | 19018089  |
| Melano        | Tremelimu    | Anti-         | -                    | 1     | 84                  | 0        |                                | 19139427  |

|              |                  |                    |    |   |     |   |                                                                                |          |
|--------------|------------------|--------------------|----|---|-----|---|--------------------------------------------------------------------------------|----------|
| ma           | mab              | CTLA<br>4          |    |   |     |   |                                                                                |          |
| Melano<br>ma | Ipilimumab       | Anti-<br>CTLA<br>4 | 10 | 2 | 57  | 0 |                                                                                | 19671877 |
| Hodgki<br>n  | Ipilimumab       | Anti-<br>CTLA<br>4 | 3  | 1 | 18  | 0 |                                                                                | 19808874 |
| Melano<br>ma | Ipilimumab       | Anti-<br>CTLA<br>4 | 3  | 2 | 71  | 0 |                                                                                | 20004617 |
| Melano<br>ma | Ipilimumab       | Anti-<br>CTLA<br>4 | 10 | 2 | 71  | 0 |                                                                                | 20004617 |
| Melano<br>ma | Tremelimu<br>mab | Anti-<br>CTLA<br>4 | -  | 2 | 241 | 2 | Perforatio<br>n,<br>sudden<br>death                                            | 20086001 |
| Melano<br>ma | Ipilimumab       | Anti-<br>CTLA<br>4 | 10 | 2 | 155 | 1 | hepatitis                                                                      | 20147741 |
| Colon        | Tremelimu<br>mab | Anti-<br>CTLA<br>4 | -  | 2 | 47  | 0 |                                                                                | 20498386 |
| Melano<br>ma | Ipilimumab       | Anti-<br>CTLA<br>4 | 3  | 3 | 131 | 2 | colitis,<br>liver<br>failure                                                   | 20525992 |
| Pancre<br>as | Ipilimumab       | Anti-<br>CTLA<br>4 | 3  | 1 | 27  | 0 |                                                                                | 20842054 |
| Melano<br>ma | Ipilimumab       | Anti-<br>CTLA<br>4 | 10 | 2 | 13  | 0 |                                                                                | 21833591 |
| Melano<br>ma | Ipilimumab       | Anti-<br>CTLA<br>4 | 3  | 2 | 40  | 1 | Perforatio<br>n                                                                | 22123319 |
| Melano<br>ma | Ipilimumab       | Anti-<br>CTLA<br>4 | 10 | 2 | 42  | 1 | Perforatio<br>n                                                                | 22123319 |
| Melano<br>ma | Ipilimumab       | Anti-<br>CTLA<br>4 | 10 | 2 | 72  | 1 | colitis                                                                        | 22456429 |
| Melano<br>ma | Tremelimu<br>mab | Anti-<br>CTLA<br>4 | -  | 3 | 328 | 7 | cardiac<br>arrest,<br>pneumon<br>ia,<br>sepsis,<br>electrolyt<br>e<br>imbalanc | 23295794 |



|                  |              |            |    |   |     |   |                                                                                                |          |
|------------------|--------------|------------|----|---|-----|---|------------------------------------------------------------------------------------------------|----------|
|                  |              |            |    |   |     |   | e,<br>pulmonar<br>y<br>embolism<br>,<br>hemorrhage,<br>colitis                                 |          |
| Prostate         | Ipilimumab   | Anti-CTLA4 | 10 | 2 | 16  | 0 |                                                                                                | 23535954 |
| Prostate         | Ipilimumab   | Anti-CTLA4 | 10 | 3 | 399 | 4 | pneumonia x3,<br>general deterioration                                                         | 24831977 |
| Melanoma         | Ipilimumab   | Anti-CTLA4 | 10 | 2 | 122 | 7 | colitis x2,<br>multiorgan failure x2,<br>cardiac arrest,<br>pneumonitis x2,<br>hepatic failure | 25369488 |
| Melanoma (uveal) | Ipilimumab   | Anti-CTLA4 | 3  | 2 | 53  | 1 | pancytopenia                                                                                   | 25761109 |
| Mesothelioma     | Tremelimumab | Anti-CTLA4 | -  | 2 | 29  | 0 |                                                                                                | 25819643 |
| Melanoma         | Ipilimumab   | Anti-CTLA4 | 3  | 3 | 256 | 1 | diarrhea                                                                                       | 25891173 |
| Melanoma         | Ipilimumab   | Anti-CTLA4 | 3  | 2 | 46  | 0 |                                                                                                | 25891304 |
| Uveal melanoma   | Tremelimumab | Anti-CTLA4 | -  | 2 | 12  | 0 |                                                                                                | 26050146 |
| Melanoma         | Ipilimumab   | Anti-CTLA4 | 3  | 2 | 20  | 0 |                                                                                                | 26410424 |
| Melanoma         | Ipilimumab   | Anti-CTLA4 | 3  | 2 | 103 | 0 |                                                                                                | 26541511 |
| Melanoma         | Ipilimumab   | Anti-CTLA4 | 10 | 3 | 471 | 5 | colitis x3,<br>myocarditis, GBS                                                                | 27717298 |
| Prostate         | Ipilimumab   | Anti-      | 10 | 3 | 399 | 9 | colitis,                                                                                       | 28034081 |

|               |              |             |    |   |      |    |                                                                             |          |
|---------------|--------------|-------------|----|---|------|----|-----------------------------------------------------------------------------|----------|
| e             |              | CTLA 4      |    |   |      |    | hepatotoxicity x2, cardiac arrest x3, renal failure, pneumonia, pneumonitis |          |
| Melanoma      | Ipilimumab   | Anti-CTLA 4 | 3  | 3 | 362  | 2  | colitis x2                                                                  | 28359784 |
| Melanoma      | Ipilimumab   | Anti-CTLA 4 | 10 | 3 | 364  | 4  | colitis x2, multiorgan failure, diarrhea                                    | 28359784 |
| Mesothelioma  | Tremelimumab | Anti-CTLA 4 | 10 | 2 | 382  | 5  | colitis x2, perforation, lung infection, skin ulcer                         | 28729154 |
| Melanoma      | Ipilimumab   | Anti-CTLA 4 | 3  | 3 | 311  | 1  | colitis                                                                     | 28889792 |
| Melanoma      | Ipilimumab   | Anti-CTLA 4 | 10 | 3 | 453  | 2  | colitis, marrow aplasia                                                     | 28891423 |
|               |              |             |    |   | 5368 | 58 | 0.01080                                                                     |          |
| Solid cancers | Nivolumab    | Anti-PD1    | -  | 1 | 39   | 0  |                                                                             | 20516446 |
| Melanoma      | Nivolumab    | Anti-PD1    | -  | 1 | 33   | 0  |                                                                             | 23724867 |
| Melanoma      | Nivolumab    | Anti-PD1    | -  | 1 | 41   | 0  |                                                                             | 24145345 |
| Melanoma      | Nivolumab    | Anti-PD1    | -  | 1 | 107  | 0  |                                                                             | 24590637 |
| Melanoma      | Nivolumab    | Anti-PD1    | -  | 3 | 206  | 0  |                                                                             | 25399552 |
| RCC           | Nivolumab    | Anti-PD1    | -  | 2 | 167  | 0  |                                                                             | 25452452 |
| Hodgkin       | Nivolumab    | Anti-PD1    | -  | 2 | 23   | 0  |                                                                             | 25482239 |
| NSCLC         | Nivolumab    | Anti-PD1    | -  | 2 | 117  | 2  | hypoxic pneumonia, ischemic stroke                                          | 25704439 |

|                                 |                   |              |   |   |     |   |                                                                                                                                                |          |
|---------------------------------|-------------------|--------------|---|---|-----|---|------------------------------------------------------------------------------------------------------------------------------------------------|----------|
| Melano<br>ma                    | Nivolumab         | Anti-<br>PD1 | - | 3 | 268 | 0 |                                                                                                                                                | 25795410 |
| RCC                             | Nivolumab         | Anti-<br>PD1 | - | 1 | 34  | 0 |                                                                                                                                                | 25800770 |
| Melano<br>ma                    | Pembrolizu<br>mab | Anti-<br>PD1 | - | 3 | 555 | 0 |                                                                                                                                                | 25891173 |
| NSCLC                           | Pembrolizu<br>mab | Anti-<br>PD1 | - | 1 | 495 | 1 | pneumon<br>itis                                                                                                                                | 25891174 |
| NSCLC                           | Nivolumab         | Anti-<br>PD1 | - | 1 | 129 | 3 | pneumon<br>itis x 3                                                                                                                            | 25897158 |
| Solid<br>cancers                | Pembrolizu<br>mab | Anti-<br>PD1 | - | 1 | 30  | 1 | cryptococ<br>cus after<br>gastritis                                                                                                            | 25977344 |
| NSCLC<br>(squamo<br>us)         | Nivolumab         | Anti-<br>PD1 | - | 3 | 131 | 0 |                                                                                                                                                | 26028407 |
| Ovarian                         | Nivolumab         | Anti-<br>PD1 | - | 2 | 20  | 0 |                                                                                                                                                | 26351349 |
| RCC                             | Nivolumab         | Anti-<br>PD1 | - | 3 | 406 | 0 |                                                                                                                                                | 26406148 |
| NSCLC<br>(non-<br>squamo<br>us) | Nivolumab         | Anti-<br>PD1 | - | 3 | 287 | 1 | encephali<br>tis                                                                                                                               | 26412456 |
| NSCLC                           | Pembrolizu<br>mab | Anti-<br>PD1 | - | 3 | 682 | 6 | [pneumo<br>nia,<br>pneumon<br>itis x 2]<br>@ 2<br>mg/kg,<br>[myocardi<br>al<br>infarction,<br>pneumon<br>ia,<br>pneumon<br>itis] @ 10<br>mg/kg | 26712084 |
| Melano<br>ma                    | Nivolumab         | Anti-<br>PD1 | - | 2 | 92  | 0 |                                                                                                                                                | 26873574 |
| Melano<br>ma                    | Pembrolizu<br>mab | Anti-<br>PD1 | - | 1 | 655 | 0 |                                                                                                                                                | 27092830 |
| Merkel<br>cell<br>carcino<br>ma | Pembrolizu<br>mab | Anti-<br>PD1 | - | 2 | 26  | 0 |                                                                                                                                                | 27093365 |
| Breast                          | Pembrolizu<br>mab | Anti-<br>PD1 | - | 1 | 32  | 1 | DIC?                                                                                                                                           | 27138582 |
| Gastric                         | Pembrolizu<br>mab | Anti-<br>PD1 | - | 1 | 39  | 0 |                                                                                                                                                | 27157491 |

|               |               |          |   |   |     |   |                                                   |          |
|---------------|---------------|----------|---|---|-----|---|---------------------------------------------------|----------|
| SCCHN         | Pembrolizumab | Anti-PD1 | - | 1 | 104 | 0 |                                                   | 27247226 |
| Brain mets    | Pembrolizumab | Anti-PD1 | - | 2 | 36  | 0 |                                                   | 27267608 |
| SCLC          | Nivolumab     | Anti-PD1 | - | 1 | 98  | 0 |                                                   | 27269741 |
| Heme          | Nivolumab     | Anti-PD1 | - | 2 | 81  | 1 | ARDS                                              | 27269947 |
| Hodgkin       | Pembrolizumab | Anti-PD1 | - | 2 | 31  | 0 |                                                   | 27354476 |
| NSCLC         | Nivolumab     | Anti-PD1 | - | 2 | 52  | 0 |                                                   | 27354485 |
| Hodgkin       | Nivolumab     | Anti-PD1 | - | 2 | 80  | 0 |                                                   | 27451390 |
| SCCHN         | Nivolumab     | Anti-PD1 | - | 3 | 236 | 2 | pneumonitis, hypercalcemia                        | 27718784 |
| HNSCC         | Nivolumab     | Anti-PD1 | - | 3 | 240 | 2 | pneumonitis, hypercalcemia                        | 27718784 |
| NSCLC         | Pembrolizumab | Anti-PD1 | - | 3 | 305 | 1 | sudden death of unknown cause                     | 27718847 |
| Bladder       | Nivolumab     | Anti-PD1 | - | 2 | 78  | 2 | pneumonitis, ITP                                  | 27733243 |
| Solid cancers | Nivolumab     | Anti-PD1 | - | 1 | 17  | 0 |                                                   | 27928714 |
| Bladder       | Pembrolizumab | Anti-PD1 | - | 1 | 33  | 0 |                                                   | 28081914 |
| Bladder       | Nivolumab     | Anti-PD1 | - | 2 | 270 | 3 | pneumonitis, cardiac failure, respiratory failure | 28131785 |
| NSCLC         | Pembrolizumab | Anti-PD1 | - | 1 | 101 | 0 |                                                   | 28168303 |
| Bladder       | Pembrolizumab | Anti-PD1 | - | 3 | 270 | 1 | pneumonitis                                       | 28212060 |
| Anal          | Nivolumab     | Anti-PD1 | - | 2 | 37  | 0 |                                                   | 28223062 |
| NSCLC         | Nivolumab     | Anti-PD1 | - | 2 | 25  | 0 |                                                   | 28266091 |
| Hodgkin       | Nivolumab     | Anti-PD1 | - | 2 | 17  | 0 |                                                   | 28267244 |
| Mesothelioma  | Pembrolizumab | Anti-PD1 | - | 2 | 25  | 0 |                                                   | 28291584 |

|                        |               |          |   |   |      |    |                        |          |
|------------------------|---------------|----------|---|---|------|----|------------------------|----------|
| Esophageal             | Nivolumab     | Anti-PD1 | - | 2 | 65   | 0  |                        | 28314688 |
| HNSCC                  | Pembrolizumab | Anti-PD1 | - | 2 | 171  | 1  | pneumonitis            | 28328302 |
| Melanoma               | Nivolumab     | Anti-PD1 | - | 2 | 24   | 0  |                        | 28342215 |
| CLL                    | Pembrolizumab | Anti-PD1 | - | 2 | 25   | 0  |                        | 28424162 |
| Uterine leiomyosarcoma | Nivolumab     | Anti-PD1 | - | 2 | 12   | 0  |                        | 28440953 |
| Hodgkin                | Pembrolizumab | Anti-PD1 | - | 2 | 210  | 0  |                        | 28441111 |
| Endometrial            | Pembrolizumab | Anti-PD1 | - | 2 | 24   | 0  |                        | 28489510 |
| PMBCL                  | Pembrolizumab | Anti-PD1 | - | 2 | 18   | 0  |                        | 28490569 |
| MMR cancers            | Pembrolizumab | Anti-PD1 | - | 2 | 86   | 0  |                        | 28596308 |
| MSI colon              | Nivolumab     | Anti-PD1 | - | 2 | 74   | 0  |                        | 28734759 |
| SCLC                   | Pembrolizumab | Anti-PD1 | - | 2 | 24   | 1  | Colitis                | 28813164 |
| Nasopharyngeal         | Pembrolizumab | Anti-PD1 | - | 2 | 27   | 1  | Sepsis                 | 28837405 |
| Melanoma               | Nivolumab     | Anti-PD1 | - | 3 | 313  | 1  | neutropenia            | 28889792 |
| Melanoma               | Nivolumab     | Anti-PD1 | - | 3 | 453  | 0  |                        | 28891423 |
| Melanoma               | Pembrolizumab | Anti-PD1 | - | 2 | 359  | 1  | diarrhea and pneumonia | 28961465 |
| Bladder                | Pembrolizumab | Anti-PD1 | - | 2 | 370  | 1  | Myocarditis/myositis   | 28967485 |
| Sarcoma                | Pembrolizumab | Anti-PD1 | - | 2 | 84   | 0  |                        | 28988646 |
| Cervical               | Pembrolizumab | Anti-PD1 | - | 2 | 24   | 0  |                        | 29095678 |
| Colon                  | Pembrolizumab | Anti-PD1 | - | 2 | 23   | 0  |                        | 29284010 |
|                        |               |          |   |   | 9136 | 33 | 0.00361                |          |
| Melanoma               | Nivolumab +   | Anti-PD1 | 1 | 1 | 16   | 0  |                        | 23724867 |

|              |                                      |                                         |   |   |     |   |                                                                                  |          |
|--------------|--------------------------------------|-----------------------------------------|---|---|-----|---|----------------------------------------------------------------------------------|----------|
|              | Ipilimumab                           | +<br>Anti-<br>CTLA<br>4                 |   |   |     |   |                                                                                  |          |
| Melano<br>ma | Nivolumab<br>+<br>Ipilimumab         | Anti-<br>PD1<br>+<br>Anti-<br>CTLA<br>4 | 3 | 1 | 37  | 0 |                                                                                  | 23724867 |
| Melano<br>ma | Nivolumab<br>+<br>Ipilimumab         | Anti-<br>PD1<br>+<br>Anti-<br>CTLA<br>4 | 3 | 2 | 94  | 3 | arrhythmi<br>a,<br>pneumon<br>itis/pneu<br>mothorax<br>,<br>pneumon<br>ia        | 25891304 |
| NSCLC        | Durvaluma<br>b +<br>tremelimu<br>mab | Anti-<br>PD1<br>+<br>Anti-<br>CTLA<br>4 | - | 1 | 102 | 3 | myasthen<br>ia,<br>pericardi<br>al<br>effusion,<br>neuromu<br>scular<br>disorder | 26858122 |
| SCLC         | Nivolumab<br>+<br>Ipilimumab         | Anti-<br>PD1<br>+<br>Anti-<br>CTLA<br>4 | 1 | 1 | 61  | 1 | pneumon<br>itis                                                                  | 27269741 |
| SCLC         | Nivolumab<br>+<br>Ipilimumab         | Anti-<br>PD1<br>+<br>Anti-<br>CTLA<br>4 | 3 | 1 | 54  | 2 | myasthen<br>ia, renal<br>failure                                                 | 27269741 |
| NSCLC        | Nivolumab<br>+<br>Ipilimumab         | Anti-<br>PD1<br>+<br>Anti-<br>CTLA<br>4 | 1 | 1 | 78  | 0 |                                                                                  | 27932067 |
| RCC          | Nivolumab<br>+<br>Ipilimumab         | Anti-<br>PD1<br>+<br>Anti-<br>CTLA<br>4 | 1 | 2 | 47  | 0 |                                                                                  | 28678668 |

|                |                            |                        |   |   |      |    |                                                                                                                  |          |
|----------------|----------------------------|------------------------|---|---|------|----|------------------------------------------------------------------------------------------------------------------|----------|
| RCC            | Nivolumab + Ipilimumab     | Anti-PD1 + Anti-CTLA 4 | 3 | 2 | 47   | 0  |                                                                                                                  | 28678668 |
| Melano ma      | Pembrolizumab + ipilimumab | Anti-PD1 + Anti-CTLA 4 | 1 | 2 | 153  | 0  |                                                                                                                  | 28729151 |
| Melano ma      | Nivolumab + Ipilimumab     | Anti-PD1 + Anti-CTLA 4 | 3 | 3 | 313  | 2  | myocarditis, liver failure                                                                                       | 28889792 |
| RCC            | Nivolumab + Ipilimumab     | Anti-PD1 + Anti-CTLA 4 | 1 | 3 | 547  | 8  | pneumonitis, pneumonia, aplastic anemia, bronchitis, GI hemorrhage, sudden death, HLH, hepatitis, lung infection | 29562145 |
|                |                            |                        |   |   |      |    |                                                                                                                  |          |
|                |                            |                        |   |   | 1549 | 19 | 0.01227                                                                                                          |          |
|                |                            |                        |   |   |      |    |                                                                                                                  |          |
| Bladder        | Atezolizumab               | Anti-PDL1              | - | 1 | 68   | 0  |                                                                                                                  | 25428503 |
| Solid cancers  | Atezolizumab               | Anti-PDL1              | - | 1 | 277  | 0  |                                                                                                                  | 25428504 |
| RCC            | Atezolizumab               | Anti-PDL1              | - | 2 | 70   | 0  |                                                                                                                  | 26755520 |
| Bladder cancer | Atezolizumab               | Anti-PDL1              | - | 2 | 310  | 0  |                                                                                                                  | 26952546 |
| NSCLC          | Atezolizumab               | Anti-PDL1              | - | 2 | 142  | 1  | cardiac failure                                                                                                  | 26970723 |
| Bladder        | Durvalumab                 | Anti-PDL1              | - | 2 | 61   | 0  |                                                                                                                  | 27269937 |

|              |                  |                  |   |       |       |     |                                                               |          |
|--------------|------------------|------------------|---|-------|-------|-----|---------------------------------------------------------------|----------|
| Merckel      | Avelumab         | Anti-PDL1        | - | 2     | 88    | 0   |                                                               | 27592805 |
| Bladder      | Atezolizumab     | Anti-PDL1        | - | 2     | 119   | 1   | Sepsis                                                        | 27939400 |
| NSCLC        | Atezolizumab     | Anti-PDL1        | - | 3     | 425   | 0   |                                                               | 27979383 |
| NSCLC        | Avelumab         | Anti-PDL1        | - | 1     | 184   | 0   |                                                               | 28373005 |
| Solid tumors | Avelumab         | Anti-PDL1        | - | 1     | 53    | 0   |                                                               | 28373007 |
| Bladder      | Avelumab         | Anti-PDL1        | - | 1     | 44    | 0   |                                                               | 28375787 |
| NSCLC        | Atezolizumab     | Anti-PDL1        | - | 2     | 659   | 1   | pneumonia                                                     | 28609226 |
| Bladder      | Durvalumab       | Anti-PDL1        | - | 2     | 191   | 2   | hepatitis, pneumonia                                          | 28817753 |
| NSCLC        | Durvalumab       | Anti-PDL1        | - | 3     | 473   | 7   | pneumonia x4, cardiomyopathy, RV failure, respiratory failure | 28885881 |
|              |                  |                  |   |       | 3164  | 12  | 0.00379                                                       |          |
|              |                  |                  |   | Total | 19217 | 122 | 0.00630                                                       |          |
|              | <b>Extracted</b> | <b>3/24/2018</b> |   |       |       |     |                                                               |          |
